# Supplementary material
Source: ML conference proceedings conference paper supplement (https://proceedings.neurips.cc/paper_files/paper/2020/hash/fd69dbe29f156a7ef876a40a94f65599-Abstract.html)
Supplement: Supplementary file [file fd69dbe29f156a7ef876a40a94f65599-Supplemental.pdf]

## 1 Proof of Theorem 1.

**Theorem 1** (Generalization bounds of evolving domain adaptation). *We further assume  $d_{\mathcal{H}\Delta\mathcal{H}}(Q_{t_1}, Q_{t_2}) \leq \alpha|t_1 - t_2|$  holds with constant  $\alpha$  for  $t_1, t_2 \geq 0$ . Then for any  $\theta$ , with probability at least  $1 - \delta$  over the sampling of target trajectory  $t_1, t_2 \cdots t_n$ ,*

$$\mathbb{E}_t \mathbb{E}_{Q_t} L(f_\theta(x), y) \leq \mathbb{E}_P L(f_\theta(x), y) + \frac{1}{n} \sum_{i=1}^n [d_{\mathcal{H}\Delta\mathcal{H}}(P, Q_{t_i})] + \mathbb{E}_t \lambda_t + O\left(\frac{\alpha}{\delta n}\right).$$

Recall the mathematical tools in analyzing generalization error bound of classic domain adaptation [1, 5]. Suppose  $\mathcal{H} = \{f_\theta | \theta \in \Theta\}$ . Then for any distribution  $P$  and  $Q$ , denote by  $d_{\mathcal{H}\Delta\mathcal{H}}$  the  $\mathcal{H}\Delta\mathcal{H}$ -divergence,

$$d_{\mathcal{H}\Delta\mathcal{H}}(P, Q) = \sup_{\theta, \theta' \in \Theta} |\mathbb{E}_P L(f_\theta(x), f_{\theta'}(x)) - \mathbb{E}_Q L(f_\theta(x), f_{\theta'}(x))|,$$

which quantifies the discrepancy between the source and target distributions. The adaptability quantified by  $\lambda$  measures the possibility of cross-domain learning [1].

$$\lambda = \min_{\theta} [\mathbb{E}_P L(f_\theta(x), y) + \mathbb{E}_Q L(f_\theta(x), y)].$$

Then we have the following generalization error bound of classical domain adaptation [1],

**Lemma 1** (Generalization bounds of classic domain adaptation). *For a symmetric loss function  $L$  satisfying triangle inequality, and any  $f_\theta \in \mathcal{H}$ , the following holds,*

$$\mathbb{E}_Q L(f_\theta(x), y) \leq \mathbb{E}_P L(f_\theta(x), y) + d_{\mathcal{H}\Delta\mathcal{H}}(P, Q) + \lambda.$$

Integrating over  $t \sim U(0, 1)$ , the left hand side becomes the loss on the evolving target domain  $Q_t$ ,

$$\mathbb{E}_t \mathbb{E}_{Q_t} L(f_\theta(x), y) \leq \mathbb{E}_P L(f_\theta(x), y) + \mathbb{E}_t [d_{\mathcal{H}\Delta\mathcal{H}}(P, Q_t)] + \mathbb{E}_t \lambda_t \quad (1)$$

To extend this analysis to the EDA problem, we need to approximate the domain discrepancy  $\mathbb{E}_t [d_{\mathcal{H}\Delta\mathcal{H}}(P, Q_t)]$  with finite target trajectories  $\{Q_{t_i}\}_{i=1}^n$ . Formally, we have the following lemma,

**Lemma 2** (Discretization of  $d_{\mathcal{H}\Delta\mathcal{H}}$  on evolving target domain). *Suppose we have target trajectories  $\{Q_{t_i}\}_{i=1}^n$  of length  $n$ . Each  $t_i$  is sampled i.i.d. from  $U(0, 1)$ . Assume  $d_{\mathcal{H}\Delta\mathcal{H}}(Q_{t_1}, Q_{t_2}) \leq \alpha|t_1 - t_2|$  holds with constant  $\alpha$  for  $1 \geq t_1, t_2 \geq 0$ . Then with probability at least  $1 - \delta$  over the sampling of  $t_i$ ,*

$$\mathbb{E}_t [d_{\mathcal{H}\Delta\mathcal{H}}(P, Q_t)] \leq \frac{1}{n} \sum_{i=1}^n [d_{\mathcal{H}\Delta\mathcal{H}}(P, Q_{t_i})] + O\left(\frac{\alpha}{\delta n}\right).$$

*Proof.* Without loss of generality, assume  $t_1 \leq t_2 \cdots t_{n-1} \leq t_n$ . Denote by  $A$  the event  $\exists t_i, t_{i+1}, |t_i - t_{i+1}| \geq \frac{\delta}{m}$ . Suppose  $D_i$  is the interval  $(\frac{i-1}{m}, \frac{i}{m}]$ , for  $i = 1, 2 \cdots m$ . Denote by  $B$  the event  $\exists i \in \{1, 2 \cdots m\}, \forall j \in \{1, 2 \cdots n\}, t_j \notin D_i$ . Then the following holds,

$$\begin{aligned} P(A) \leq P(B) &= 1 - \frac{\binom{n-1}{m-1}}{\binom{n+m}{m-1}} \\ &\approx 1 - \frac{(n+1)^{n+1} (n-1)^{n-1}}{(n-m)^{n-m} (n+m)^{n+m}} \\ &\approx 1 - \left(\frac{n-1}{n+1}\right)^{m-1} \\ &< e^{-\left(\frac{n-1}{n+1}\right)^{m-1}}, \end{aligned}$$

for large  $m$  and  $n$ . The first step comes from Stirling's equation. The second step is due to  $\lim_{x \rightarrow 0} (1+x)^{\frac{1}{x}} = e$ . The final step holds since  $1+x < e^x$  for  $x \neq 0$ . Setting  $m$  to  $\lfloor \frac{1}{2\delta} \rfloor$ , we have with probability at least  $1 - \delta$ ,

$$\max_i |t_i - t_{i-1}| < \frac{1}{\frac{\log(1-\delta)}{\log(n-1) - \log(n+1)} + 1} = O\left(\frac{1}{\delta n}\right)$$

Then  $\forall t \in (\frac{t_{i-1}+t_i}{2}, \frac{t_i+t_{i+1}}{2}]$ ,

$$\begin{aligned} d_{\mathcal{H}\Delta\mathcal{H}}(P, Q_t) &\leq d_{\mathcal{H}\Delta\mathcal{H}}(P, Q_{t_i}) + \alpha|t - t_i| \\ &= d_{\mathcal{H}\Delta\mathcal{H}}(P, Q_{t_i}) + O\left(\frac{\alpha}{\delta n}\right). \end{aligned}$$

Integrating over  $t$ , we complete the proof.  $\square$

To prove Theorem 1, we plug Lemma 2 into equation (1).

## 2 Dataset Details

**Rotated MNIST:** We randomly rotate the MNIST training set and test set by  $0 - 180^\circ$ . The original training set (60000 images) is used as the source training dataset. For each rotation in the evolving target dataset, we randomly sample only 100 images. In meta-training, the model is trained on the source dataset and random target trajectory with length 10. In meta-testing, for efficient evaluation, the model is adapted sequentially to  $120^\circ, 126^\circ \dots 174^\circ$ . Each target rotation in meta-testing also has 100 samples, and we test the performance on the 10000-sample rotated MNIST test set.

**Evolving Vehicles** comprises of 2000 images of sedans and trucks in 1970 – 2020 collected from [bing.com](http://bing.com). Each decade has 200 sedans and trucks. We use 1980 to 1995 in meta-training, and test on 2000 to 2015 in meta-testing. The batch size is set to 20.

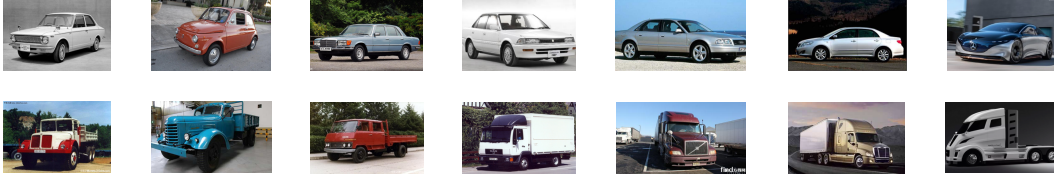

Figure 1: Examples of the Evolving Vehicles dataset.

**Caltran:** The dataset is available at <http://cma.berkeleyvision.org>. See Figure 2 for examples of the dataset. The dataset consists of 5432 images in total. We use the first 500 images as the source dataset. We use the following 2000 images in meta-training and the last 2932 images in meta-testing. The batch size is set to 20.

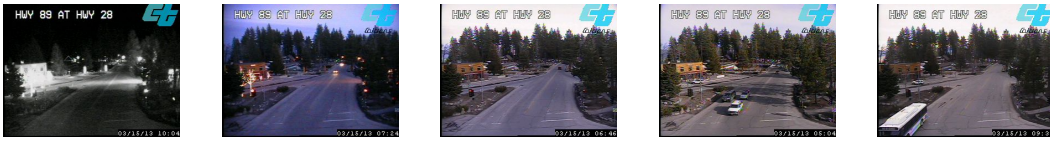

Figure 2: Examples of the Caltran dataset. It contains images captured at an interval of 3 minutes over two weeks, formulating a challenging continually evolving target, since it includes changes in time, illumination, weather, etc.

## 3 Additional Experimental Details

We implement our model on PyTorch with 2080Ti GPUs. We calculate joint MMD following [4]. Suppose the batch size of the source domain is  $n_P$  and the batch size of the target domain is  $n_Q$ ,

$$\widehat{d}(P, Q) = \frac{1}{n_P^2} \sum_{i,j} k((x_i^p, \hat{y}_i^p), (x_j^p, \hat{y}_j^p)) + \frac{1}{n_Q^2} \sum_{i,j} k((x_i^q, \hat{y}_i^q), (x_j^q, \hat{y}_j^q)) - \frac{2}{n_P n_Q} \sum_{i,j} k((x_i^p, \hat{y}_i^p), (x_j^q, \hat{y}_j^q)).$$

The feature used in joint MMD is the output of the adapter. The kernel we apply is multi Gaussian kernel based on <https://github.com/thuml/Xlearn/blob/master/pytorch/src/loss.py>.

For Rotated MNIST, the input size of image is  $28 \times 28$ . We do not adopt further pre-processing to avoid affecting the rotation. For Evolving Vehicles and Caltran, the input size is set to  $84 \times 84$ . We use random horizontal flip and random resized crop as pre-processing.

The implementation of MAML is based on <https://github.com/dragen1860/MAML-Pytorch/>. In meta-training, we update the adapter and the classifiers for 10 steps in the inner loop. The hyperparameter of weighted adaptation is set with importance weighted cross validation [6].

When implementing the baseline methods, we follow the protocol of DANN [2] and CDAN [3]. The domain discriminator is a three-layer fully connected network with BatchNorm and ReLU activations. The code of CycleGAN is modified based on <https://github.com/junyanz/pytorch-CycleGAN-and-pix2pix>.

**Numerical results in Figure 3 of the main text.** In the main text, we provided results on Caltran and Vehicles in Figure 3 due to limitation of space. We further provide numerical results in Table 1.

Table 1: Accuracy (%) on Evolving Vehicles.

| Method      | 1995            | 2000            | 2005            | 2010            | 2015            | 2020            |
|-------------|-----------------|-----------------|-----------------|-----------------|-----------------|-----------------|
| DANN        | 51.0±1.5        | 54.9±0.8        | 58.6±1.2        | 65.5±1.0        | 69.3±1.1        | 70.4±1.5        |
| JAN Merge   | 67.2±1.8        | 68.4±1.6        | 66.0±0.9        | 65.7±1.0        | 64.9±1.4        | 64.3±1.0        |
| <b>EAML</b> | <b>70.1±1.3</b> | <b>69.8±0.9</b> | <b>72.5±0.8</b> | <b>73.6±1.3</b> | <b>75.5±1.4</b> | <b>75.2±1.1</b> |

## References

- [1] S. Ben-David, J. Blitzer, K. Crammer, A. Kulesza, F. Pereira, and J. W. Vaughan. A theory of learning from different domains. *Machine Learning*, 79(1-2):151–175, 2010.
- [2] Y. Ganin, E. Ustinova, H. Ajakan, P. Germain, H. Larochelle, M. Marchand, and V. Lempitsky. Domain-adversarial training of neural networks. *Journal of Machine Learning Research*, 17(1):2096–2030, 2016.
- [3] M. Long, Z. Cao, J. Wang, and M. I. Jordan. Conditional adversarial domain adaptation. In *Advances in Neural Information Processing Systems 31*, pages 1640–1650. 2018.
- [4] M. Long, H. Zhu, J. Wang, and M. I. Jordan. Deep transfer learning with joint adaptation networks. In *Proceedings of the 34th International Conference on Machine Learning (ICML)*, pages 2208–2217, 2017.
- [5] Y. Mansour, M. Mohri, and A. Rostamizadeh. Domain adaptation: Learning bounds and algorithms. In *The 22nd Conference on Learning Theory, Montreal, Quebec, Canada, June 18-21, 2009*, 2009.
- [6] M. Sugiyama, M. Krauledat, and K.-R. Muller. Covariate shift adaptation by importance weighted cross validation. *JMLR*, 8(May):985–1005, 2007.
